# Supplementary material for: A Hydrofluoric Acid-Free Green Synthesis of Magnetic M.Ti2CTx Nanostructures for the Sequestration of Cesium and Strontium Radionuclide
Source: MDPI journal article supplement (doi:10.3390/nano12183253), 2022-09-19
Supplement: s1 [file s1]

## Supplementary Information

# A Hydrofluoric Acid-Free Green Synthesis of Magnetic M.Ti<sub>2</sub>CT<sub>x</sub> Nanostructures for the Sequestration of Cesium and Strontium Radionuclide

Jibran Iqbal <sup>1,\*</sup>, Kashif Rasool <sup>2</sup>, Fares Howari <sup>1</sup>, Yousef Nazzal <sup>1</sup>, Tapati Sarkar <sup>3</sup> and Asif Shahzad <sup>3,\*</sup>

<sup>1</sup> College of Natural and Health Sciences, Zayed University, Abu Dhabi 144534, United Arab Emirates,

Fares.Howari@zu.ac.ae (F.H.); Yousef.Nazzal@zu.ac.ae (Y.N.)

<sup>2</sup> Qatar Environment and Energy Research Institute, Hamad Bin Khalifa University (HBKU), Qatar

Foundation, P.O. Box 5824, Doha, Qatar; kashifrs1@hbku.edu.qa

<sup>3</sup> Department of Materials Science and Engineering, Uppsala University, Box 35, SE-75103 Uppsala, Sweden; tapati.sarkar@angstrom.uu.se

\* Correspondence: Jibran.iqbal@zu.ac.ae (J.I.); asif.shahzad@angstrom.uu.se (A.S.); Tel.: +971-55-9188346 (J.I.); +46-764510726 (A.S.)

## Supplementary Note

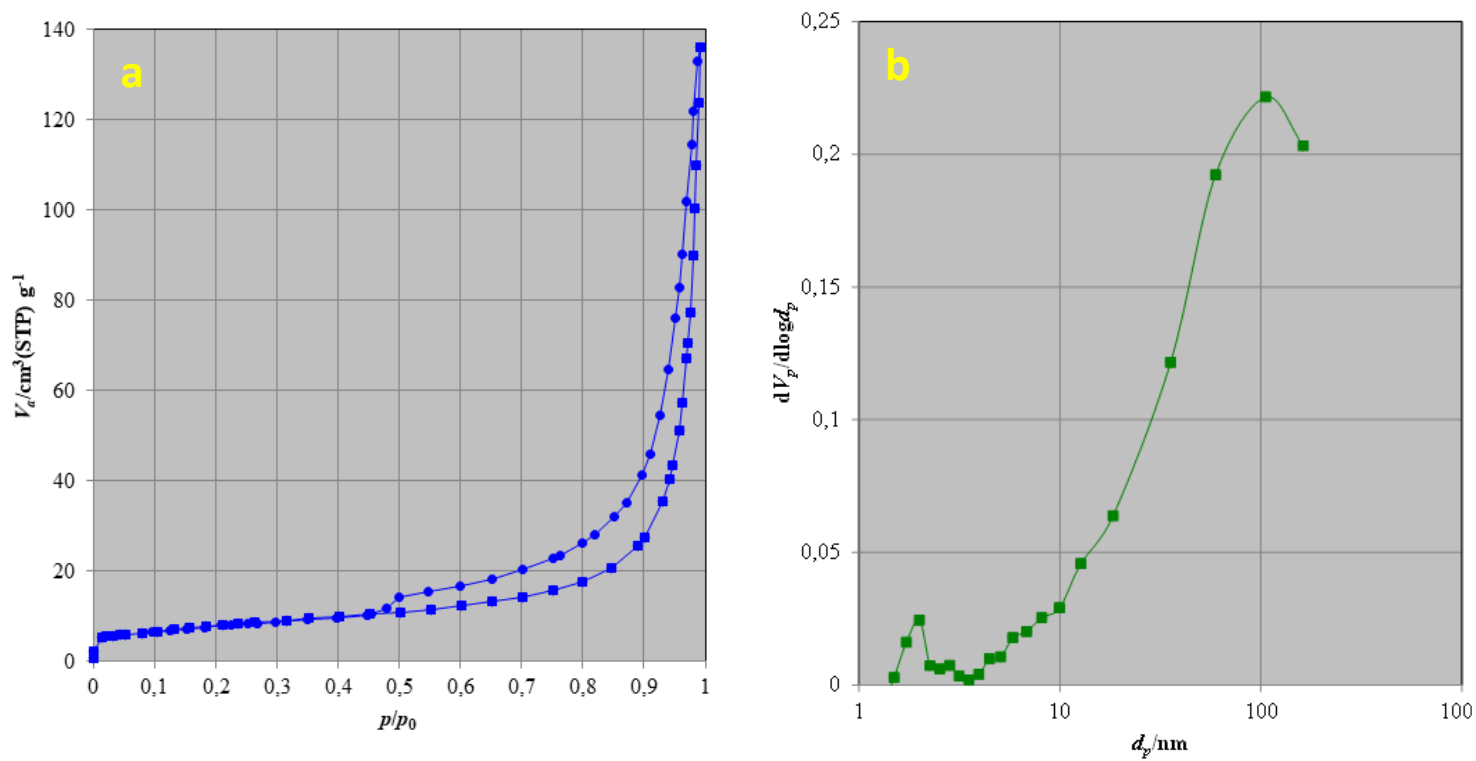

**Figure S1.** (a) The BET adsorption/desorption isotherm and (b) BJH pore size distribution graph of  $M.Ti_2CT_xA_{III}$

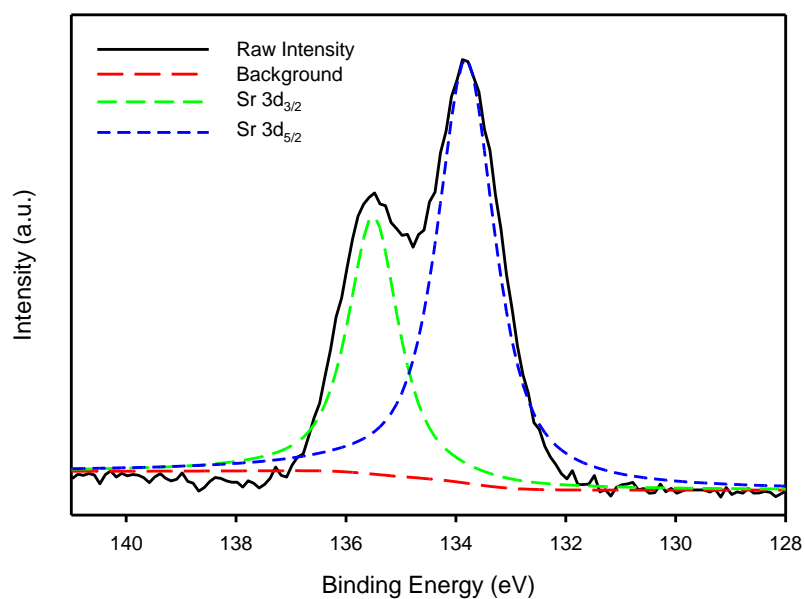

**Figure S2.** The XPS peak fitting analysis of Sr 3d in  $M.Ti_2CT_x.A_{III}$  after radionuclides adsorption

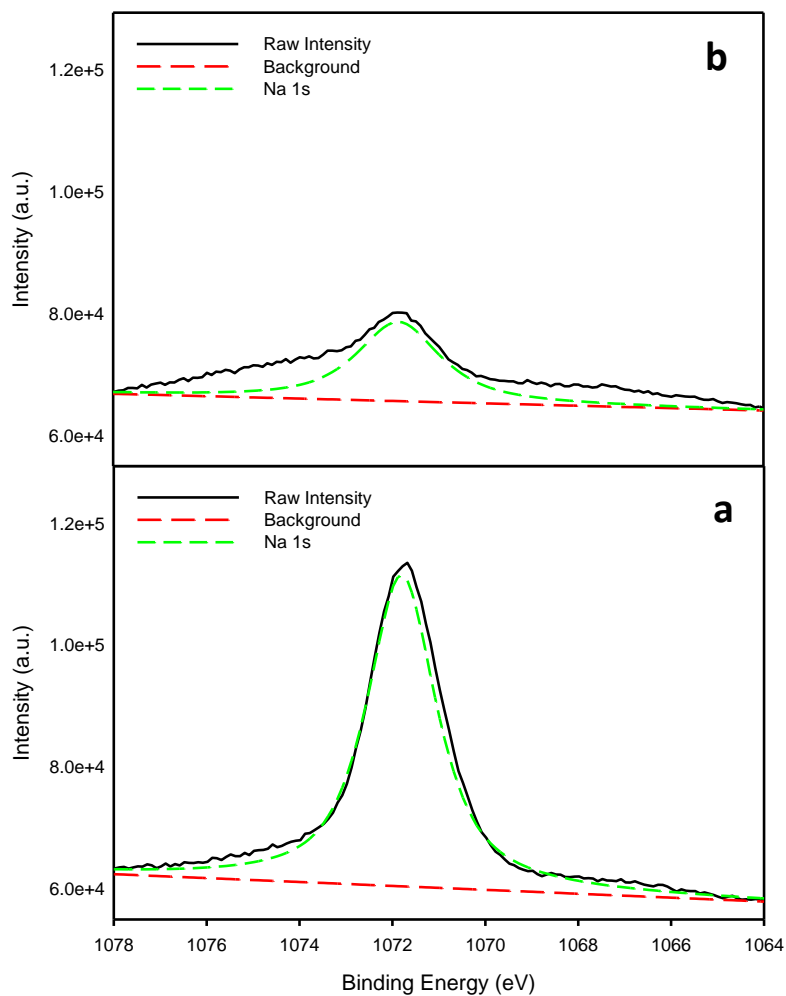

**Figure S3.** The XPS peak fitting analysis of Na 1s (a) before and (b) after radionuclides adsorption in  $M.Ti_2CT_x.A_{III}$

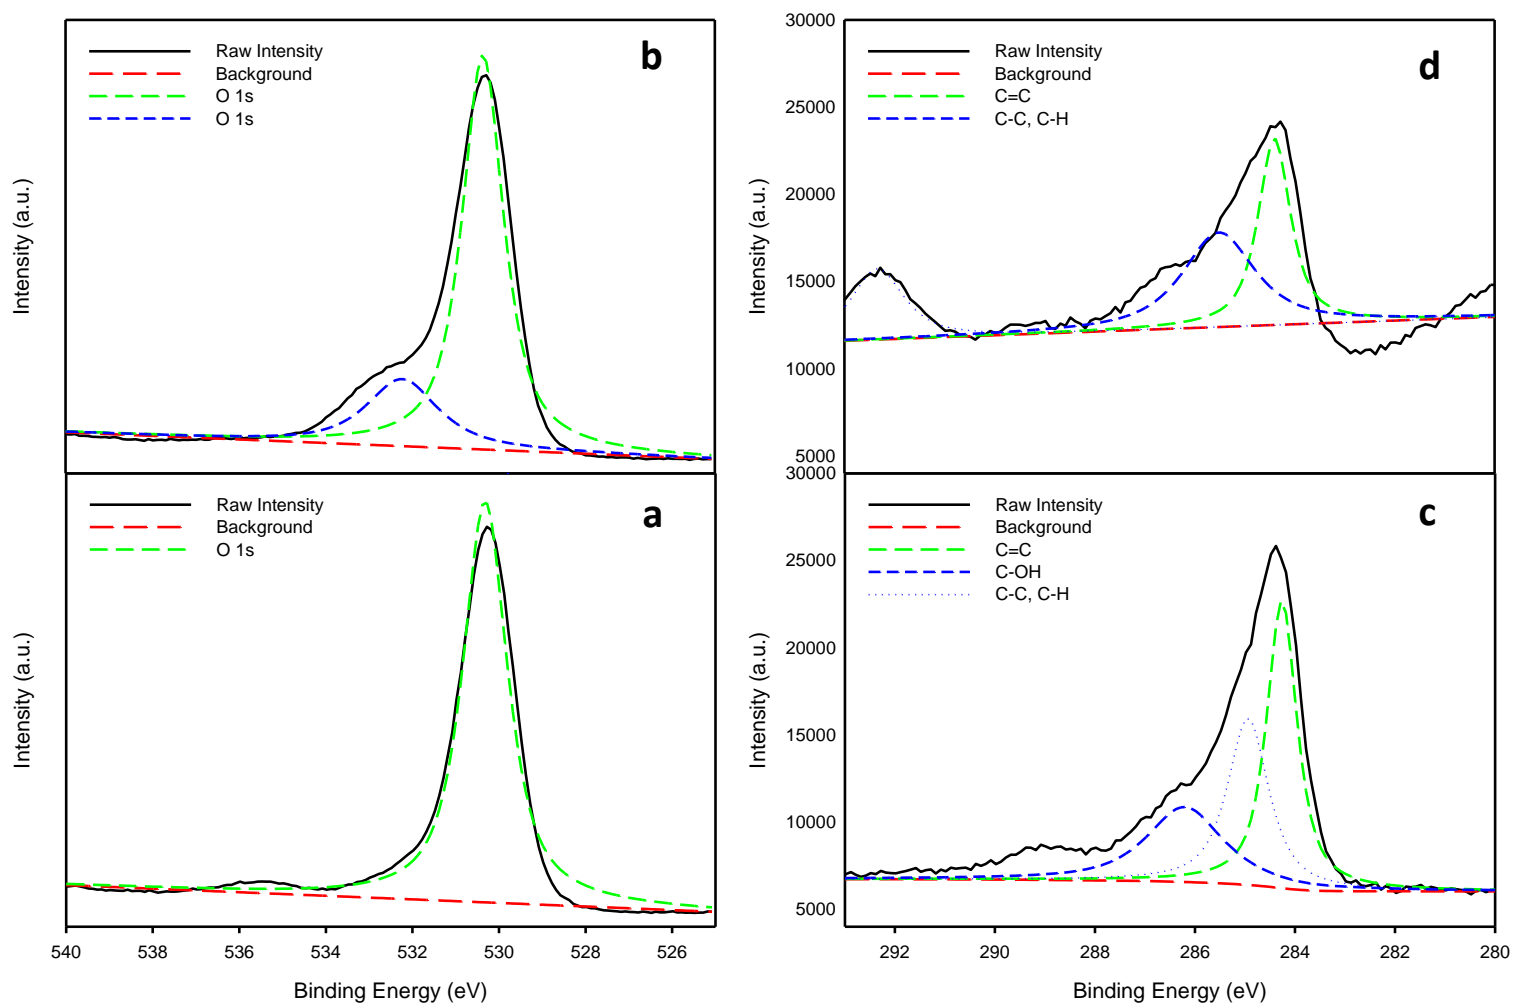

**Figure S4.** The XPS peak fitting analysis of O 1s and C 1s before (a & c) and after (b & d) radionuclides adsorption, respectively, in  $M.Ti_2CT_xA_{III}$

**Table S1.** Elemental composition of  $M.Ti_2CT_x.A_{III}$  measured in SEM-EDS analysis.

| Element | Line Type | Wt%    | Wt% Sigma | Atomic % |
|---------|-----------|--------|-----------|----------|
| C       | K series  | 31.62  | 0.21      | 47.21    |
| O       | K series  | 33.83  | 0.25      | 37.91    |
| Na      | K series  | 5.13   | 0.07      | 4.00     |
| Al      | K series  | 0.12   | 0.03      | 0.08     |
| Ti      | K series  | 26.17  | 0.17      | 9.80     |
| Fe      | K series  | 3.13   | 0.11      | 1.01     |
| Total:  |           | 100.00 |           | 100.00   |

**Table S2.** Elemental composition of  $M.Ti_2CT_x.A_{III}$  after  $Sr^{2+}$  and  $Cs^{+}$  adsorption, measured in SEM-EDS analysis.

| Element | Line Type | Wt%    | Wt% Sigma | Atomic % |
|---------|-----------|--------|-----------|----------|
| C       | K series  | 21.91  | 0.18      | 37.04    |
| O       | K series  | 35.28  | 0.21      | 44.78    |
| Na      | K series  | 1.20   | 0.04      | 1.06     |
| Al      | K series  | 0.58   | 0.03      | 0.44     |
| Si      | K series  | 1.88   | 0.05      | 1.36     |
| Ti      | K series  | 28.80  | 0.16      | 12.21    |
| Fe      | K series  | 6.27   | 0.12      | 2.28     |
| Sr      | L series  | 2.57   | 0.12      | 0.59     |
| Cs      | L series  | 1.52   | 0.14      | 0.23     |
| Total:  |           | 100.00 |           | 100.00   |

**Table S3.** Elemental composition (Atomic%) of as-prepared  $M.Ti_2CT_x.A_{III}$  and after  $Sr^{2+}$  and  $Cs^+$  adsorption, measured in XPS analysis.

| Sample                               | Atomic concentration (%) |      |       |       |       |       |       |       |
|--------------------------------------|--------------------------|------|-------|-------|-------|-------|-------|-------|
|                                      | Ti 2p3                   | C 1s | Na 1s | O 1s  | Al 2p | Fe 2p | Sr 3d | Cs 3d |
| $M.Ti_2CT_x.A_{III}$                 | 21.89                    | 16   | 8.54  | 52.44 | 1.12  | –     | –     | –     |
| $Sr^{2+}, Cs^+ @ M.Ti_2CT_x.A_{III}$ | 22.02                    | 15.8 | 1.51  | 59.54 | –     | –     | 1.74  | –     |
